# Supplementary material for: Acetylation regulates Cyclophilin A catalysis, immunosuppression and HIV isomerization
Source: Springer Nature journal article supplement (doi:10.1038/nchembio.342), 2010-04-04
Supplement: 41589_2010_BFnchembio342_MOESM3_ESM.mol [file 41589_2010_BFnchembio342_MOESM3_ESM.mol]

  ChemDraw03231010552D

 13 12  0  0  0  0  0  0  0  0999 V2000
   -1.0730   -2.3516    0.0000 N   0  0  0  0  0  0  0  0  0  0  0  0
   -0.3560   -1.9377    0.0000 C   0  0  0  0  0  0  0  0  0  0  0  0
    0.3610   -2.3516    0.0000 C   0  0  0  0  0  0  0  0  0  0  0  0
    0.3610   -3.1795    0.0000 O   0  0  0  0  0  0  0  0  0  0  0  0
   -0.3560   -1.1098    0.0000 C   0  0  0  0  0  0  0  0  0  0  0  0
    0.0579   -0.3929    0.0000 C   0  0  0  0  0  0  0  0  0  0  0  0
   -0.3546    0.3216    0.0000 C   0  0  0  0  0  0  0  0  0  0  0  0
    0.0579    1.0361    0.0000 C   0  0  0  0  0  0  0  0  0  0  0  0
   -0.3546    1.7506    0.0000 N   0  0  0  0  0  0  0  0  0  0  0  0
    0.0579    2.4650    0.0000 C   0  0  0  0  0  0  0  0  0  0  0  0
   -0.3546    3.1795    0.0000 C   0  0  0  0  0  0  0  0  0  0  0  0
    0.8829    2.4650    0.0000 O   0  0  0  0  0  0  0  0  0  0  0  0
    1.0730   -1.9406    0.0000 O   0  0  0  0  0  0  0  0  0  0  0  0
  1  2  1  0      
  2  3  1  0      
  3  4  2  0      
  2  5  1  1      
  5  6  1  0      
  6  7  1  0      
  7  8  1  0      
  8  9  1  0      
  9 10  1  0      
 10 11  1  0      
 10 12  2  0      
  3 13  1  0      
M  END
